# Supplementary material
Source: MDPI journal article supplement (https://www.mdpi.com/2073-4441/16/9/1312)
Supplement: s1 [file s1]

# Supplementary Material

## Treatment of Pickle Wastewater under Varying Salinity Conditions within the Sequencing Batch Biofilm Reactor System

Nuonan Shen <sup>1</sup>, Hongyun Guo <sup>1</sup>, Tingting Yao <sup>1</sup>, Li Xu <sup>2</sup>, Youxian Gao <sup>2</sup> and Ping Yang <sup>1,\*</sup>

<sup>1</sup> College of Architecture and Environment, Sichuan University, Chengdu 610065, China

<sup>2</sup> Sichuan Academy of Eco-Environmental Science, Chengdu 610041, China

\* Correspondence: yangpinga301@163.com; Tel./Fax: +86-028-85402838

### 1. Experiment equipment.

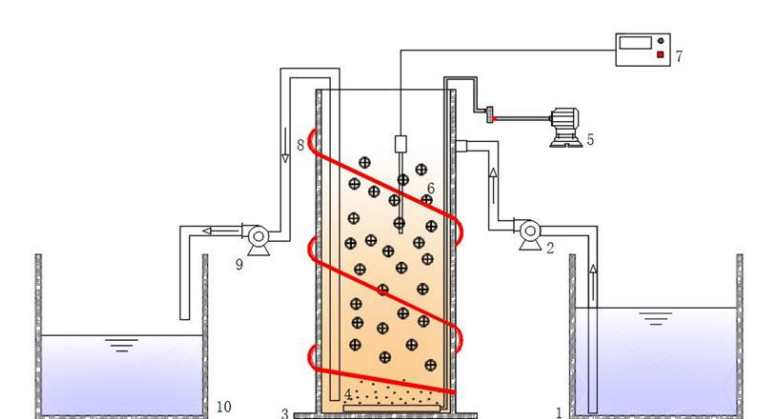

- 1-Water inlet tank; 2- Feed pump; 3-Reactor;  
4-Aeration plate; 5-Air pump; 6-Biological carrier;  
7-Temperature controller; 8-Heating wire;  
9-Discharge pump; 10-Water outlet tank

Figure S1. Experiment equipment.

## 2. Trace element nutrient solution.

Table S1 Trace element nutrient solution

| Element                              | Content<br>(mg/L) | Element                                             | Content (mg/L) |
|--------------------------------------|-------------------|-----------------------------------------------------|----------------|
| FeCl <sub>3</sub> •6H <sub>2</sub> O | 1.5               | CaCl <sub>2</sub>                                   | 0.12           |
| MnSO <sub>4</sub> •H <sub>2</sub> O  | 0.12              | EDTA                                                | 3              |
| ZnSO <sub>4</sub> •7H <sub>2</sub> O | 0.12              | H <sub>3</sub> BO <sub>3</sub>                      | 0.15           |
| CoCl <sub>2</sub> •6H <sub>2</sub> O | 0.15              | CuSO <sub>4</sub> •5H <sub>2</sub> O                | 0.03           |
| MgSO <sub>4</sub> •7H <sub>2</sub> O | 0.12              | Na <sub>2</sub> MoO <sub>4</sub> •2H <sub>2</sub> O | 0.06           |

## 3. Calibration curves

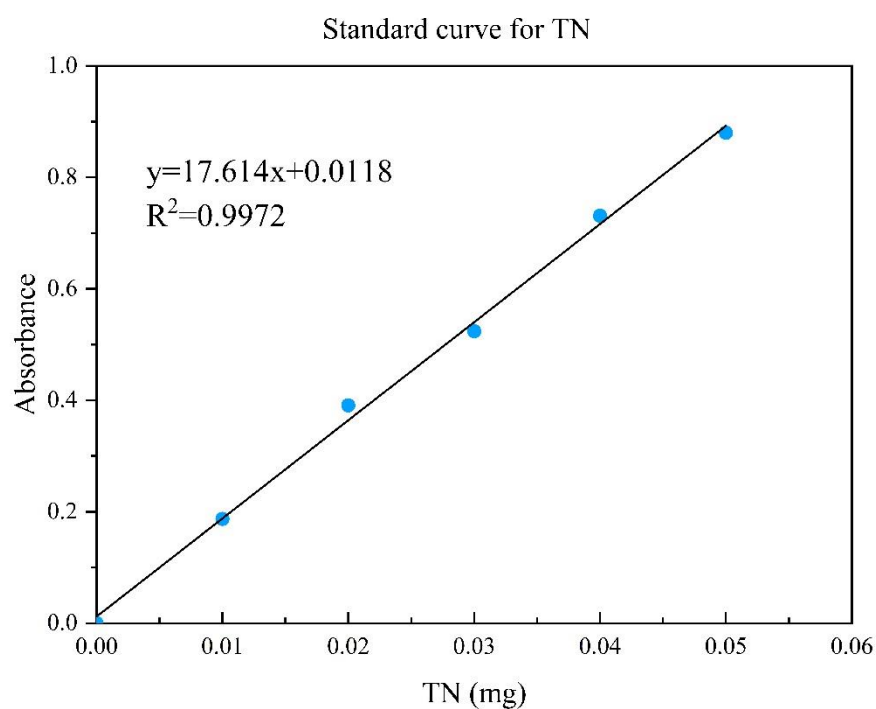

Figure S2 Standard curve for TN.

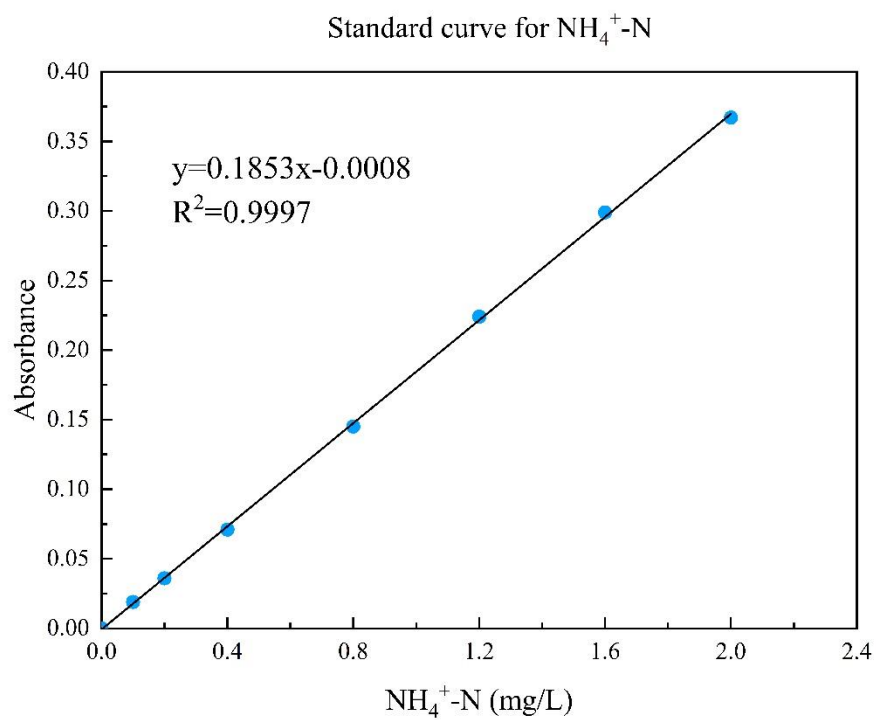

Figure S3 Standard curve for  $\text{NH}_4^+\text{-N}$ .

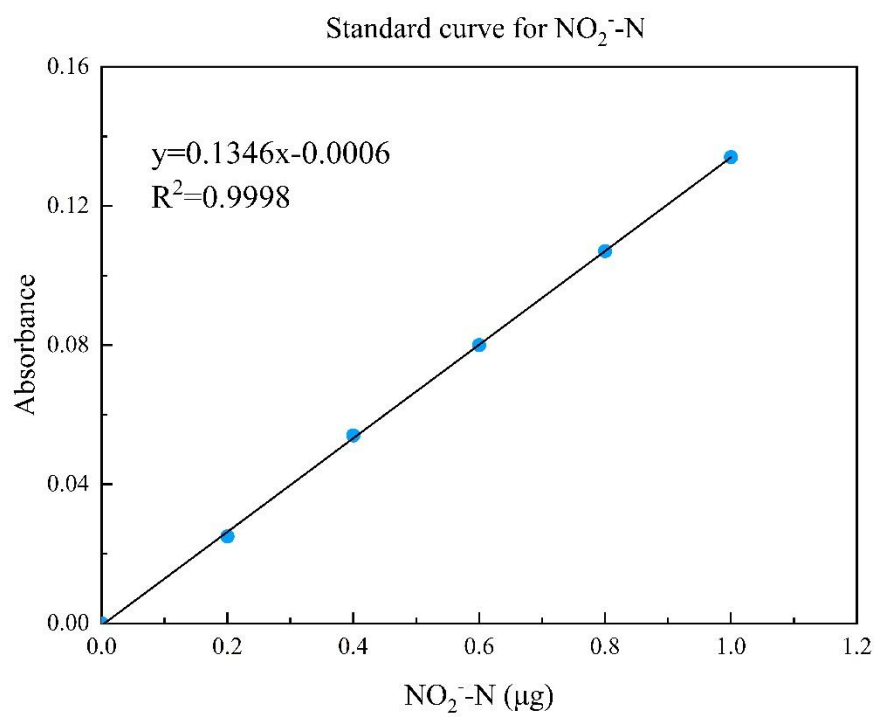

Figure S4 Standard curve for  $\text{NO}_2^-\text{-N}$ .

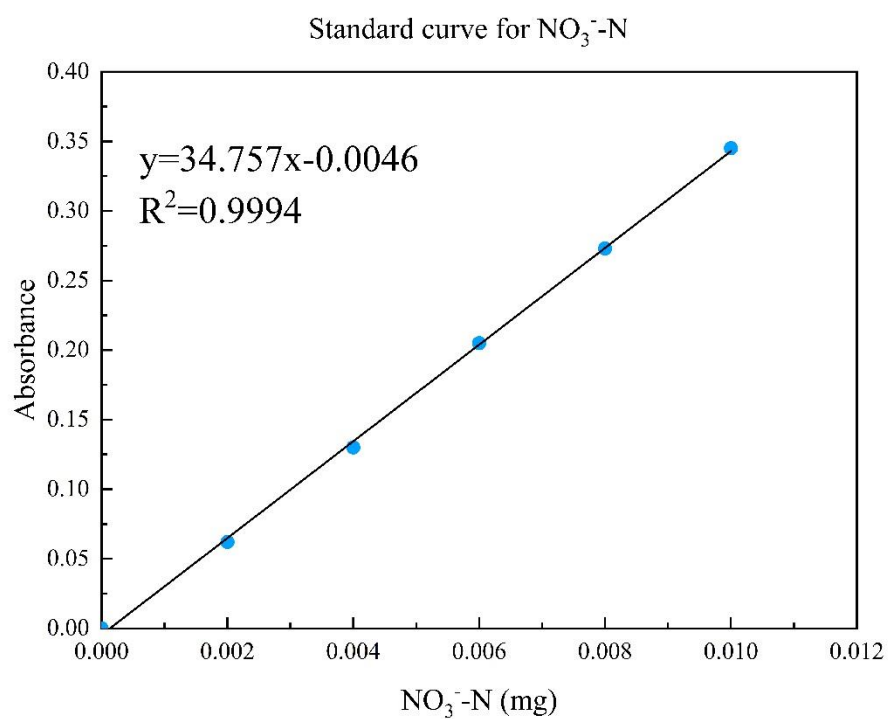

Figure S5 Standard curve for  $\text{NO}_3^-$ -N.
